# Supplementary material
Source: publisher site journal article supplement (https://www.dovepress.com/article/580462)
Supplement: Supplementary file 1 [file 580462%20Revised%20Supplementary%20Information.docx]

**Supplementary Table 1**:**Baseline Characteristics of Patients in the Non-Progression group and Progression Sets**

|  |  | **Non-Progression** | **Progression** | **P value** |
| --- | --- | --- | --- | --- |
|  |  | （n=494） | （n=594） |  |
| Gender,n(%) |  |  |  | <0.001 |
|  | Male | 177 (35.8) | 298 (50.2) |  |
|  | Female | 317 (64.2) | 296 (49.8) |  |
| Smoking status,n(%) |  |  |  | <0.001 |
|  | Never | 403 (81.6) | 391 (65.8) |  |
|  | Former | 41 ( 8.3) | 71 (12.0) |  |
|  | Current | 50 (10.1) | 132 (22.2) |  |
| Hypertension,n(%) |  |  |  | <0.001 |
|  | No | 433 (87.7) | 365 (61.4) |  |
|  | Yes | 61 (12.3) | 229 (38.6) |  |
| Diabetes,n(%) |  |  |  | <0.001 |
|  | No | 451 (91.3) | 413 (69.5) |  |
|  | Yes | 43 ( 8.7) | 181 (30.5) |  |
| Age,y |  | 52.5 | 58 | <0.001 |
|  |  | (46.00, 58.00) | (52.00, 66.00) |  |
| BMI, kg/m2 |  | 23.21 | 23.96 | <0.001 |
|  |  | (20.58, 25.66) | (22.04, 25.95) |  |
| MMEF% |  | 52.06 | 44.12 | <0.001 |
|  |  | (41.10, 61.36) | (37.01, 51.71) |  |
| MEF50% |  | 59.81 | 49.86 | <0.001 |
|  |  | (49.11, 72.90) | (41.81, 59.05) |  |
| MEF25% |  | 36.95 | 35.38 | 0.004 |
|  |  | (28.83, 49.08) | (28.38, 43.47) |  |
| FEV1% |  | 85.12 | 89.6 | 0.005 |
|  |  | (74.81, 100.00) | (78.00, 100.95) |  |
| FEV1/FVC ratio |  | 0.78 | 0.72 | <0.001 |
|  |  | (0.74, 0.82) | (0.71, 0.74) |  |
| Red blood cell |  | 4.59 | 4.65 | 0.049 |
| (×1012/L) |  | (4.28, 4.94) | (4.33, 5.01) |  |
| Hemoglobin |  | 136 | 141 | <0.001 |
| (g/L) |  | (127.00, 146.00) | (132.00, 152.00) |  |
| Platelet |  | 184 | 178 | 0.257 |
| (×109/L) |  | (142.00, 228.75) | (143.00, 220.75) |  |
| White blood cell |  | 5.73 | 5.73 | 0.975 |
| (×109/L) |  | (4.81, 6.85) | (4.81, 7.00) |  |
| Neutrophil |  | 3.38 | 3.53 | 0.273 |
| (×109/L) |  | (2.66, 4.37) | (2.74, 4.50) |  |
| Lymphocyte |  | 1.71 | 1.62 | 0.052 |
| (×109/L) |  | (1.37, 2.09) | (1.34, 2.00) |  |
| Monocyte |  | 0.33 | 0.34 | 0.806 |
| (×109/L) |  | (0.26, 0.44) | (0.26, 0.44) |  |
| Eosinophil |  | 0.09 | 0.1 | 0.248 |
| (×109/L) |  | (0.06, 0.16) | (0.06, 0.17) |  |
| Basophil |  | 0.02 | 0.03 | 0.017 |
| (×109/L) |  | (0.02, 0.03) | (0.02, 0.04) |  |
| Albumin |  | 46.2 | 46.3 | 0.738 |
| (g/L) |  | (43.50, 48.20) | (43.70, 48.40) |  |
| Glucose |  | 4.98 | 5.11 | 0.005 |
| (mmol/L) |  | (4.60, 5.44) | (4.67, 5.59) |  |
| Triglyceride |  | 1.24 | 1.34 | 0.024 |
| (mmol/L) |  | (0.90, 1.76) | (0.96, 1.84) |  |
| Cholesterol |  | 4.78 | 4.95 | 0.002 |
| (mmol/L) |  | (3.97, 5.61) | (4.28, 5.69) |  |

Abbreviations：BMI，Body mass index；COPD，Chronic Obstructive Pulmonary Disease；MMEF%，Maximum Mid-Expiratory Flow；MEF50%，Maximum Expiratory Flow at 50% of Vital Capacity；MEF25%，Maximum Expiratory Flow at 25% of Vital Capacity；FEV1%，Forced Expiratory Volume in 1 Second Percentage Predicted.

**Supplementary Figure 1**:**Time-dependent ROC curve**


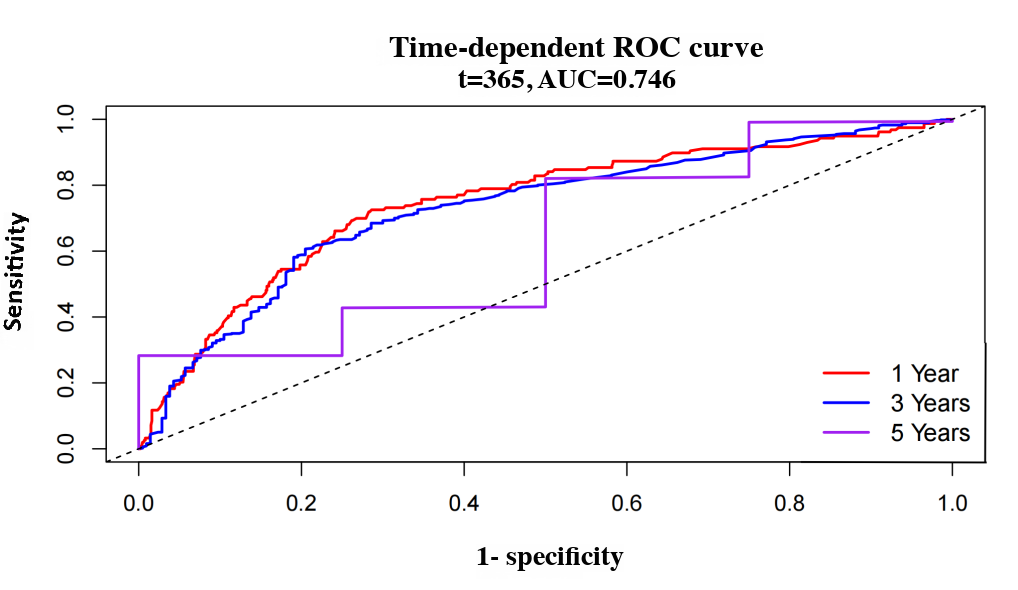


**Supplementary Figure 1**. Time-dependent ROC curves for evaluating the predictive performance of the Cox model at 1, 3, and 5 years. At 1 year, the area under the curve (AUC) was 0.746; at 3 years, AUC was 0.729; and at 5 years, AUC was 0.632. The model showed moderate predictive accuracy for 1- and 3- year outcomes, while its performance declined at 5 years, implying a gradual reduction in discriminative ability over time.

**Supplementary Figure 2**:**Kaplan - Meier Survival Curves Comparing High - Risk and Low - Risk Groups**


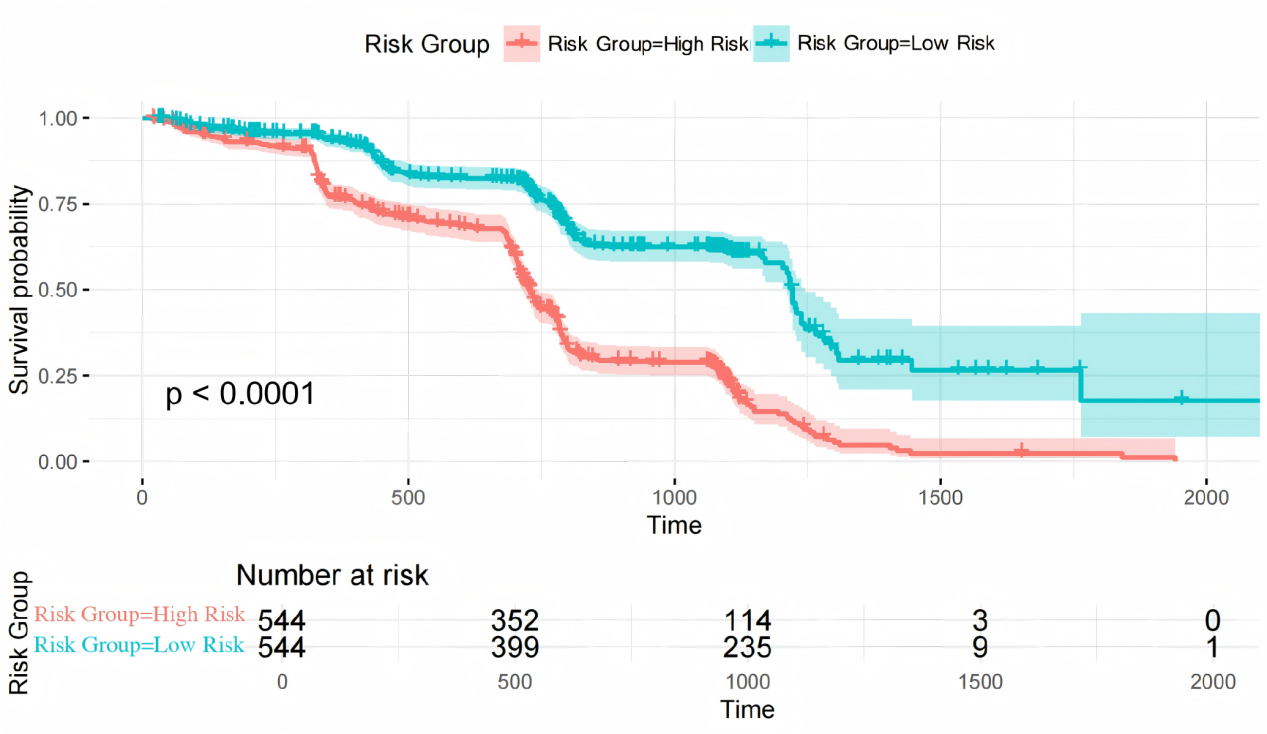


**Supplementary Figure 2.** Kaplan - Meier survival curve comparing high-risk and low-risk groups classified by sample risk scores relative to the median. The curve shows a significant difference in survival progression between the two groups (p < 0.0001). The "Number at risk" table below depicts the number of samples at risk in each group at different time points.
